# Supplementary material
Source: Research Square preprint supplement (doi:10.21203/rs.3.rs-8377744/v1)
Supplement: Supplementary file 1 [file 9c6000e9647d72cf9303c10d.docx]

**Electronic supernumerary information**

**Light-Independent Antimicrobial and Acaricidal Ag/TiO₂ exhibited Reduced Allergenicity**

Xiaoyu Liu2,#,Jie Sun11,2,#, Massimiliano Galluzzi1, Huanqiong Zhong1, Zhenfu Zhou1, Shiguo Chen1,*

1 College of Materials Science and Engineering, Shenzhen University, Shenzhen, 518060, PR China

2 Institute of Allergy and Immunology, School of Medicine, Shenzhen University, Shenzhen, 518060, PR China

# These authors contributed equally to this work and should be considered co-first authors

*Corresponding author: Tel & Fax: +86 755 86713962, *E*-mail: [csg@szu.edu.cn](mailto:csg@szu.edu.cn) (S.G. Chen)

**S1. Experimental section**

**S1.1 Preparation of ATN**

The Ag/TiO2 nanoparticles (ATN) colloidal suspension was prepared by a photocatalytic reduction process from silver nitrate (AgNO3, 0.53 g, Aladdin, AR), TiO2 colloid (25.28 g, Shenzhen Bao Shun Mei technology Co. Ltd, Shenzhen, China, 5.0 wt.%, mean size of 5 nm) and deionized water (475 mL).

**S1.2 Structural characterization**

The ultraviolet-visible (UV-vis) absorbance spectrum of the ATN colloid solution ranging from 200 to 800 nm was analyzed using a Shimadzu UV-2550 spectrometer. The X-ray diffraction (XRD) pattern of the ATN was recorded using Cu-Ka radiation (40 kV and 300 mA) at a scan rate of 12º min-1 in 2θ. The surface morphology and particle sizes of the ATN were observed using a high-resolution transmission electron microscope (HR-TEM, FEI Tecnai G2) equipped with energy dispersive X-ray spectroscopy (EDS) devices at 200 kV accelerating voltage. The TEM samples were prepared by placing a drop of a dilute colloidal dispersion of ATN on the surface of a 400-mesh copper grid coated with Formvar and drying in a vacuum chamber for 1 h. The surface composition of the ATN was analyzed by elemental mapping.

**S1.3 Synergistic antimicrobial activities and antimicrobial mechanism assay**

The minimum inhibitory concentrations (MICs) of ATN against Gram-positive *Staphylococcus aureus* (*S. aureus*,ATCC 6538), *Klebsiella pneumoniae* (*K. pneumonia,* ATCC 4352), *Streptococcus epidermidis* (*S.epidermidis*, ATCC 12228), *Streptococcus haemolyticus* (*S.haemolyticus*, ATCC 19615) and Gram-negative *Escherichia coli* (*E.coli*,ATCC 25922), *Acinetobacter baumannii* (*A. baumannii,* ATCC 11038) and *Pseudomonas aeruginosa* (*P. aeruginosa*,ATCC 9027) were determined by measuring the optical density at 600 nm (OD600) using a by monitoring via automatic turbidimetric system (Bioscreen C, Finland) at 310 K. For comparison, the antibacterial activities of TiO2 and Ag nanoparticles were evaluated. The Gram-positive *S. aureus*, *K. pneumonia, S.epidermidis*, *S.haemolyticus*, and Gram-negative *E.coli*, *A. baumannii,P. aeruginosa* used as test bacteria were provided by Microbial Culture Collection Center of Guangdong Institute of Microbiology. The bacteria were cultivated according to the management regulations of Class II biological safety cabinets in biosafety level 2 laboratory.

Scanning electron microscopy (SEM) was employed to further study the morphological changes in *E. coli* cells caused by ATN[1, 2]. NO level and MP were evaluated according to operating manual using Total Nitric Oxide Assay Kit and (Beyotime, Jiangsu Province) and MycoLight bacterial viability assay kit.

**Fig.S1** Bacteria growth curve in LB Lennox liquid medium with nano Ag, TiO2, and ATN. (a-c) Gram-positive bacteria: (a) *K.pneumonia*; (b) *S.epidermidis;* (c) *S.pyogenes;* and (d-e) Gram-negative bacteria (d) *E.coli*, (e) *A. baumannii*;(f) *P. aeruginosa.*.The growth of bacteria was monitored measuring the OD580. Each data point represents the mean value of three independent experiments shown with standard error of the mean.

**Table S1**. MIC of ATN against different bacteria

| Bacteria and code | Grama | MICs (μg/ml) | | |
| --- | --- | --- | --- | --- |
| TiO2 | Ag | ATA |
| *S. aureus* (ATCC6538) | ＋ | >200 | 8 | 16 (Ag-3.36,TiO2-12.64) |
| *K. pneumonia* (ATCC4352) | ＋ | >200 | 2 | 4 (Ag-0.84, TiO2-3.16) |
| *S. epidermidis* (ATCC12228) | ＋ | >200 | 4 | 8 (Ag-1.68, TiO2-6.32) |
| *S.pyogenes* (ATCC19615) | ＋ | >200 | 6 | 14 (Ag-2.95,TiO2-11.05) |
| *E.coli* (ATCC25922) | － | >200 | 8 | 16 (Ag-3.36, TiO2-12.64) |
| *A. baumannii* (ATCC11038) | － | >200 | 4 | 10 (Ag-2.11, TiO2-7.89) |
| *P. aeruginosa* (ATCC9027) | － | >200 | 10 | 16 (Ag-3.37, TiO2-12.63) |

**Fig. S2.** Effects of ATN stress on *E.coli* at different incubation time

**Fig. S3.** GO enrichment analysis of the differentially expressed proteins of *E.coli* after being contacted for (a) 3h and (b) 7h. *Note*. the blue nodes represent upregulated proteins, while the red nodes represent downregulated proteins.

**S1.4 Anti-mite activity and anti-mite mechanism**

**Fig. S4.** (a) Minimum inhibitory concentration (MIC) of ATN against HDM；The morphology of HDM treated with ATA for different contact time by stereomicroscope (b) 0h; (c)9 h; (d) 18h.

**Fig.S5.** Examples of force curves (a) on different PDMS and (b) quantitative Gaussian analysis. After measurement the tip was analyzed on clean Mica surface to check the status and cleanliness. The tip was also calibrated on standard PDMS calibration samples (Bruker) with different moduli (2.5 MPa and 3.5 MPa). Using the tip after measurements on mites, the calibration on standards gave E1=2.55±0.12 MPa (for 2.5 MPa) and E2=3.69±0.23 MPa (for 3.5 MPa)

Measurements on HDMs were performed combining morphology with force spectroscopy. Force spectroscopy measurements were performed by ramping the atomic force microscope (AFM) tip against the sample surface and measuring a Force Curve (FC), i.e. the interaction force as a function of the tip-sample distance. Force spectroscopy can be combined with imaging using Force Volume (FV) techniques. In FV a force curve is made on every point of a regular matrix defined on a selected area. Morphology is reconstructed from the ensemble of recorded FC, producing a 1:1 correspondence between morphology and mechanical properties map. In these particular experiments morphology was acquired but it is meaningless due to surface irregularities and heterogeneity.

**Fig. S6.** Optical analysis with CCD camera integrated in AFM (the black shadow on right side is AFM tip, cantilever, chip out of focus). (A1-A4) alive HDM; (T1-T4) ATN treated HDM.

Before AFM morphological and mechanical investigation, HDMs were detected with vertical optical camera. Regions with HDMs control and after treatment are shown in Fig.S6, respectively. AFM measurement was performed by pointing AFM probe on central abdomen region of HDMs.

All the mechanical maps were acquired with the following parameters: low lateral resolution 16 x16 force curves, characterized by 4096 points each. Lateral scan size 10 mm, the ramp length was maintained between *L*= 8 mm, a maximum applied force F ≈7 mN, a tip velocity v = 20 μm/s. We employed a sharp probe with cone angle 19° and cantilever with elastic constant k =33 N/m (elastic constant was calibrated in air using thermal tuning method). Samples were measured at room temperature condition T=23°C.

On each mite a series of 7-10 force volume measurements were performed varying the position macroscopically on the main body of mite (avoiding head and legs). Data and average are presented at the end.

Raw AFM data were analyzed accordingly with Puricelli[3] and our work[4]. Sneddon model with Bilodeau [5] correction for pyramidal indenter was used to fit the force (F)-vs-indentation (δ) curve and extract the Young’s modulus.

(Bilodeau) (1)

where E, ν and α represent the local Young’s modulus, the Poisson ratio (0.5 for elastic material) and the averaged half-opening angle of the four-sided pyramidal indenter, respectively.

This model is working on elastic, linear, homogenous and thick material. The geometry and elastic constant of the probe was extracted by measuring calibration samples of PDMS with 2.5 MPa and 3.5 MPa. The results of typical force curves and Young’s moduli distribution is presented in Fig.S7a &b.

The worst assumption is the homogeneity, as the sample is complex and vertically heterogeneous (for example, the tip is indenting different layers: external shell, internal tissues, organs). To avoid this problem, the indentation range was restricted focusing on medium-high indentation range. In this range Sneddon is acceptable, as the contact area is bigger, stable and the many-layers system is averaged.

Example of 64 × 64 resolution morphology and mechanical maps on ATN treated HDMs are shown in Fig.S7. Unfortunately, alive mites are breathing and moving so it is not possible to acquire high resolution morphology that necessitates of long measurement time HDMs skin is composed by long stripes with a thickness of 1.5 um. Fig.S7a shows the compressed morphology obtained at maximum indentation (F=6.2 uN), while Fig.4b shows the real morphology without compression (obtained by compressed morphology + indentation). Map of Young’s modulus in log10 scale in 1:1 correspondence with morphology is shown in Fig.4d. A typical profile line of Young’s modulus is shown in top panel of Fig.S9b, while comparison of morphology profile is shown in the bottom panel of Fig.S7b.

Observing the profile in Fig.S7, the Young’s modulus on the skin stripe is higher than modulus of space in between stripes. The tip is indenting more between one stripe and another, showing a soft space between harder stripes. This structure is supposedly giving both elasticity (skin will adhere to the internal structure) and mechanical support to the body shape. A single indentation curve is shown in Fig.S7c. We decided to not use experimental data between 0% and 30% indentation to avoid contributions from morphological inhomogeneities and lateral slipping of the probe. Sneddon model fitting is superimposed to original data in Fig.S7c. Finally, all Young’s modulus values from analysis are collected in a histogram (Fig.S7d) showing a Gaussian distribution around the average value. From Gaussian analysis the average value and error are recorded.

Data presented in Fig.S7e clearly show a behavior in mechanical properties for ATN treated HDMs. Typical Young’s modulus map of untreated HDM is shown in Fig.4c, showing an higher modulus compared with treated HDM in Fig.S7e. A possible explanation relies on the fact that living and healthy HDMs actively maintain their structural rigidity via: muscular tone, circulatory regulation and cellular homeostasis. Once they are treated and severely impaired, these active processes cease. Even if the body is still structurally intact, the active tension maintenance disappears, resulting in lowered mechanical modulus.

After measurement the tip was analyzed on clean Mica surface to check the status and cleanliness. The tip was also calibrated on standard PDMS calibration samples (Bruker) with different moduli (2.5 MPa and 3.5 MPa).

**Fig S7**.Morpho-mechanical measurements on ATN treated HDMs (a) compressed morphology obtained at maximum applied force (6.2 uN); (**b**) profile comparison of Young’s modulus (top) and morphology (bottom, compressed and real); (**c**) example of single force vs. indentation curve with Sneddon (Bilodeau) fit at medium-high indentation range; (**d**) statistical analysis of total map Young’s modulus using histogram with Gaussian distribution fitting. (**e**) Mechanical map of ATN treated HDMs.

**Fig. S8**. Hemolytic evaluation. Morphology of human red blood cells incubated with different ATN concentration and water.

The effects of ATN on mitochondria in the colon, ileum, stomach tissue, and kidney tissue cells of mice were evaluated by transmission electron microscopy (TEM) as shown in Fig. S9. **i**) Colon, according to the electron microscopy results, the control group had tight mitochondrial matrix and intact cristae structure, and no pathological changes were observed (Fig.S9A1). Compared with the control group, the low-dose group (3.52 μg ATN) showed slight morphological changes without severe structural damage (Fig. S9A2). Compared with the low-dose group (3.52 μg ATN), the high-dose group (35.2 μg ATN) showed significantly aggravated mitochondrial damage. The medium dose group showed significant mitochondrial fission and calcium deposition, with partial disruption of the cristae structure (Fig.S9A3). **ii**) Ileum, according to the electron microscopy results, the control group showed completely normal mitochondrial structure, including tight matrix and clear cristae (Fig. S9B1). The low-dose group (3.52 μg ATN) only showed slight morphological changes and mitochondrial fission, without obvious vacuolization or cristae disintegration (Fig. S9B2). Compared with the low-dose group (3.52 μg ATN), the high-dose group (35.2 μg ATN) showed significantly aggravated mitochondrial damage, manifested by significant matrix vacuolization and ridge structure disorder (Fig. S9B3). **iii**) Stomach, according to the electron microscopy results, the control group has a uniform mitochondrial matrix and intact cristae structure (Fig. S9C1). Although the low-dose group (3.52 μg ATN) did not cause damage to the cristae structure, mitochondrial condensation occurred (Fig. S9C2). The high-dose group (35.2 μg ATN) not only exhibited similar shrinkage and volume reduction phenomena as the low-dose group, but also showed significant disruption of the cristae structure (Fig. S9C3). **iv**) Kidney, according to the electron microscopy results, the matrix density of the control group is uniform, and the cristae are arranged neatly (Fig. S9D1). Compared with the control group, the low-dose group showed complete cristae structure, but mitochondrial condensation occurred (Fig. S9D2). Compared with the low-dose group (3.52 μg ATN), the high-dose group (35.2 μg ATN) showed significantly aggravated mitochondrial damage, manifested as changes in cristae structure disorder (Fig. S9D3). The above results indicate that ATN has toxic effects on the mitochondria of the digestive system and kidneys in mice. As the dose of ATN increases, the degree of mitochondrial damage in various tissues of mice gradually worsens, manifested as matrix vacuolization, collapse and disappearance of cristae structures, calcium precipitation, and other phenomena. Moreover, the higher the dose, the more severe the damage.

**Fig.S9** The effects of different content of ATN per mouse on mitochondria and lysosomes in the colon, ileum, stomach, kidney, and liver organs of mice. The pink downward arrow indicates mitochondria (Mt), and the blue upward arrow indicates lysosomes (Ly).

**Table S2**. Date Set

| Group | Incubation time | | Differential protein group  (Date set) | GO ID number |
| --- | --- | --- | --- | --- |
| 3h | 7h |
| Control | 115 | 116 | D115116 | 138 |
| ATN | 113 | 114 | D113114 | 206 |
| Differential protein group (Date Set) | D115113 | D116114 | - | - |
| GO ID number | 151 | 106 | - | - |

*Note*: Proteins with expression levels greater than or equal to 2-fold and P value ≤ 0.05 are considered differentially expressed proteins.

The number of differentially expressed proteins between each pair of libraries. Date set GO number and annotation can be Seen in “ATN—dif pro list.xls” and “ATN—GO annotation.xls”.

The enriched classification results of differentially expressed proteins in molecular function and biological process can be found in “ATN--GO-Enrichment Analysis SResult.doc” and the classification of proteins, please refer to “ATN--GO-Enrichment Analysis Result with protein ID.xlsx”

**Table S3** GO Enrichment Analysis of Proteins with Differential Expressions (**Molecular Function**)

| Date Set | GO ID | GO Level | GO Term | Cluster Frequency | Protein Frequency of Use | P Value* |
| --- | --- | --- | --- | --- | --- | --- |
| D115113 | GO:1901265 | 3 | nucleoside phosphate binding | 54/147,36.73% | 458/1595,28.71% | 0.0411 |
| D115113 | GO:0000166 | 4 | nucleotide binding | 54/147,36.73% | 458/1595,28.71% | 0.0411 |
| D115113 | GO:0051287 | 5 | NAD binding | 10/147,6.80% | 41/1595,2.57% | 0.0079 |
| D115113 | GO:0003723 | 4 | RNA binding | 20/147,13.61% | 138/1595,8.65% | 0.0454 |
| D115113 | GO:0005515 | 2 | protein binding | 34/147,23.13% | 229/1595,14.36% | 0.0045 |
| D115113 | GO:0042802 | 3 | identical protein binding | 31/147,21.09% | 203/1595,12.73% | 0.0044 |
| D115113 | GO:0048037 | 2 | cofactor binding | 29/147,19.73% | 191/1595,11.97% | 0.0068 |
| D115113 | GO:0050662 | 3 | coenzyme binding | 22/147,14.97% | 135/1595,8.46% | 0.0084 |
| D115113 | GO:0036094 | 2 | small molecule binding | 61/147,41.50% | 503/1595,31.54% | 0.0135 |
| D115113 | GO:0016491 | 2 | oxidoreductase activity | 34/147,23.13% | 255/1595,15.99% | 0.0259 |
| D115113 | GO:0016616 | 4 | oxidoreductase activity, acting on the CH-OH group of donors, NAD or NADP as acceptor | 11/147,7.48% | 62/1595,3.89% | 0.0374 |
| D116114 | GO:0005488 | 1 | binding | 89/101,88.12% | 1251/1595,78.43% | 0.0204 |
| D116114 | GO:1901681 | 2 | sulfur compound binding | 5/101,4.95% | 25/1595,1.57% | 0.0347 |
| D116114 | GO:0030170 | 3 | pyridoxal phosphate binding | 7/101,6.93% | 41/1595,2.57% | 0.0243 |
| D116114 | GO:0005515 | 2 | protein binding | 25/101,24.75% | 229/1595,14.36% | 0.0045 |
| D116114 | GO:0042802 | 3 | identical protein binding | 22/101,21.78% | 203/1595,12.73% | 0.0093 |
| D116114 | GO:0048037 | 2 | cofactor binding | 21/101,20.79% | 191/1595,11.97% | 0.0094 |
| D116114 | GO:0019842 | 3 | vitamin binding | 5/101,4.95% | 16/1595,1.00% | 0.0026 |
| D116114 | GO:0033218 | 2 | amide binding | 4/101,3.96% | 17/1595,1.07% | 0.0369 |
| D116114 | GO:0043167 | 2 | ion binding | 63/101,62.38% | 830/1595,52.04% | 0.0436 |
| D116114 | GO:0043168 | 3 | anion binding | 42/101,41.58% | 482/1595,30.22% | 0.0165 |
| D116114 | GO:0008238 | 5 | exopeptidase activity | 5/101,4.95% | 25/1595,1.57% | 0.0347 |
| D116114 | GO:0016835 | 3 | carbon-oxygen lyase activity | 9/101,8.91% | 53/1595,3.32% | 0.0086 |
| D116114 | GO:0016769 | 3 | transferase activity, transferring nitrogenous groups | 5/101,4.95% | 19/1595,1.19% | 0.0076 |
| D116114 | GO:0008483 | 4 | transaminase activity | 4/101,3.96% | 18/1595,1.13% | 0.0471 |
| D115116 | GO:0043177 | 3 | organic acid binding | 9/134,6.72% | 37/1595,2.32% | 0.0058 |
| D115116 | GO:0031406 | 4 | carboxylic acid binding | 9/134,6.72% | 37/1595,2.32% | 0.0058 |
| D115116 | GO:0016597 | 5 | amino acid binding | 6/134,4.48% | 23/1595,1.44% | 0.0227 |
| D115116 | GO:0043167 | 2 | ion binding | 84/134,62.69% | 830/1595,52.04% | 0.0177 |
| D115116 | GO:0043168 | 3 | anion binding | 53/134,39.55% | 482/1595,30.22% | 0.0248 |
| D113114 | GO:1901265 | 3 | nucleoside phosphate binding | 79/199,39.70% | 458/1595,28.71% | 0.0014 |
| D113114 | GO:0000166 | 4 | nucleotide binding | 79/199,39.70% | 458/1595,28.71% | 0.0014 |
| D113114 | GO:0017076 | 5 | purine nucleotide binding | 60/199,30.15% | 324/1595,20.31% | 0.0014 |
| D113114 | GO:0032553 | 5 | ribonucleotide binding | 62/199,31.16% | 347/1595,21.76% | 0.0029 |
| D113114 | GO:0035639 | 4 | purine ribonucleoside triphosphate binding | 58/199,29.15% | 320/1595,20.06% | 0.0031 |
| D113114 | GO:0005525 | 5 | GTP binding | 10/199,5.03% | 37/1595,2.32% | 0.0243 |
| D113114 | GO:0005524 | 5 | ATP binding | 50/199,25.13% | 291/1595,18.24% | 0.0197 |
| D113114 | GO:0001882 | 3 | nucleoside binding | 60/199,30.15% | 323/1595,20.25% | 0.0013 |
| D113114 | GO:0001883 | 4 | purine nucleoside binding | 59/199,29.65% | 321/1595,20.13% | 0.0019 |
| D113114 | GO:0032550 | 5 | purine ribonucleoside binding | 58/199,29.15% | 320/1595,20.06% | 0.0031 |
| D113114 | GO:0032549 | 4 | ribonucleoside binding | 59/199,29.65% | 321/1595,20.13% | 0.0019 |
| D113114 | GO:0005515 | 2 | protein binding | 48/199,24.12% | 229/1595,14.36% | 0.0003 |
| D113114 | GO:0042802 | 3 | identical protein binding | 41/199,20.60% | 203/1595,12.73% | 0.0022 |
| D113114 | GO:0036094 | 2 | small molecule binding | 87/199,43.72% | 503/1595,31.54% | 0.0006 |
| D113114 | GO:0032555 | 5 | purine ribonucleotide binding | 60/199,30.15% | 323/1595,20.25% | 0.0013 |
| D113114 | GO:0030554 | 5 | adenyl nucleotide binding | 50/199,25.13% | 293/1595,18.37% | 0.0223 |
| D113114 | GO:0019001 | 5 | guanyl nucleotide binding | 12/199,6.03% | 40/1595,2.51% | 0.0052 |
| D113114 | GO:0097367 | 2 | carbohydrate derivative binding | 64/199,32.16% | 355/1595,22.26% | 0.0018 |
| D113114 | GO:0032561 | 5 | guanyl ribonucleotide binding | 12/199,6.03% | 40/1595,2.51% | 0.0052 |
| D113114 | GO:0032559 | 5 | adenyl ribonucleotide binding | 50/199,25.13% | 292/1595,18.31% | 0.021 |
| D113114 | GO:0043168 | 3 | anion binding | 78/199,39.20% | 482/1595,30.22% | 0.01 |
| D113114 | GO:0043531 | 4 | ADP binding | 4/199,2.01% | 6/1595,0.38% | 0.0158 |
| D113114 | GO:0003824 | 1 | catalytic activity | 165/199,82.91% | 1189/1595,74.55% | 0.0097 |
| D113114 | GO:0052689 | 4 | carboxylic ester hydrolase activity | 7/199,3.52% | 21/1595,1.32% | 0.0395 |
| D113114 | GO:0016874 | 2 | ligase activity | 24/199,12.06% | 80/1595,5.02% | 0.0001 |
| D113114 | GO:0016875 | 3 | ligase activity, forming carbon-oxygen bonds | 13/199,6.53% | 26/1595,1.63% | 0 |
| D113114 | GO:0016876 | 4 | ligase activity, forming aminoacyl-tRNA and related compounds | 13/199,6.53% | 26/1595,1.63% | 0 |
| D113114 | GO:0004812 | 5 | aminoacyl-tRNA ligase activity | 13/199,6.53% | 26/1595,1.63% | 0 |
| D113114 | GO:0016746 | 3 | transferase activity, transferring acyl groups | 12/199,6.03% | 52/1595,3.26% | 0.047 |
| D113114 | GO:0016868 | 4 | intramolecular transferase activity, phosphotransferases | 5/199,2.51% | 10/1595,0.63% | 0.0192 |

* Chi-square test

**Table S4** GO Enrichment Analysis of Proteins with Differential Expressions (**biological process**)

| Data Set | GO ID | GO Level | GO Term | Cluster Frequency | Protein Frequency of Use | P Value* |
| --- | --- | --- | --- | --- | --- | --- |
| D115113 | GO:0044281 | 3 | small molecule metabolic process | 66/141,46.81% | 589/1562,37.71% | 0.0334 |
| D115113 | GO:0044282 | 4 | small molecule catabolic process | 20/141,14.18% | 134/1562,8.58% | 0.0262 |
| D115113 | GO:0016054 | 5 | organic acid catabolic process | 14/141,9.93% | 86/1562,5.51% | 0.0324 |
| D115113 | GO:0006082 | 4 | organic acid metabolic process | 50/141,35.46% | 368/1562,23.56% | 0.0017 |
| D115113 | GO:0043436 | 5 | oxoacid metabolic process | 50/141,35.46% | 368/1562,23.56% | 0.0017 |
| D115113 | GO:0006081 | 3 | cellular aldehyde metabolic process | 11/141,7.80% | 47/1562,3.01% | 0.0057 |
| D115113 | GO:0046487 | 4 | glyoxylate metabolic process | 6/141,4.26% | 9/1562,0.58% | 0.0001 |
| D115113 | GO:0055114 | 3 | oxidation-reduction process | 23/141,16.31% | 105/1562,6.72% | 0 |
| D115113 | GO:0015980 | 4 | energy derivation by oxidation of organic compounds | 19/141,13.48% | 70/1562,4.48% | 0 |
| D115113 | GO:0045333 | 5 | cellular respiration | 17/141,12.06% | 57/1562,3.65% | 0 |
| D115113 | GO:0042816 | 3 | vitamin B6 metabolic process | 4/141,2.84% | 9/1562,0.58% | 0.0143 |
| D115113 | GO:0042819 | 4 | vitamin B6 biosynthetic process | 4/141,2.84% | 9/1562,0.58% | 0.0143 |
| D115113 | GO:0046459 | 5 | short-chain fatty acid metabolic process | 4/141,2.84% | 10/1562,0.64% | 0.0226 |
| D115113 | GO:0009060 | 5 | aerobic respiration | 14/141,9.93% | 33/1562,2.11% | 0 |
| D115113 | GO:0046395 | 5 | carboxylic acid catabolic process | 14/141,9.93% | 86/1562,5.51% | 0.0324 |
| D115113 | GO:0019752 | 5 | carboxylic acid metabolic process | 49/141,34.75% | 357/1562,22.86% | 0.0015 |
| D115113 | GO:0051246 | 4 | regulation of protein metabolic process | 9/141,6.38% | 44/1562,2.82% | 0.0373 |
| D115113 | GO:0032268 | 5 | regulation of cellular protein metabolic process | 9/141,6.38% | 41/1562,2.62% | 0.0231 |
| D115113 | GO:0010608 | 5 | posttranscriptional regulation of gene expression | 9/141,6.38% | 37/1562,2.37% | 0.0109 |
| D115113 | GO:0034248 | 4 | regulation of cellular amide metabolic process | 9/141,6.38% | 36/1562,2.30% | 0.0089 |
| D115113 | GO:0006417 | 5 | regulation of translation | 9/141,6.38% | 36/1562,2.30% | 0.0089 |
| D115113 | GO:0006412 | 5 | translation | 18/141,12.77% | 110/1562,7.04% | 0.0136 |
| D115113 | GO:0006518 | 5 | peptide metabolic process | 22/141,15.60% | 139/1562,8.90% | 0.0092 |
| D115113 | GO:0006091 | 3 | generation of precursor metabolites and energy | 20/141,14.18% | 95/1562,6.08% | 0.0002 |
| D115113 | GO:0006520 | 3 | cellular amino acid metabolic process | 28/141,19.86% | 207/1562,13.25% | 0.0294 |
| D115113 | GO:1901606 | 5 | alpha-amino acid catabolic process | 8/141,5.67% | 33/1562,2.11% | 0.0185 |
| D115113 | GO:0009066 | 5 | aspartate family amino acid metabolic process | 12/141,8.51% | 52/1562,3.33% | 0.0019 |
| D115113 | GO:0046451 | 4 | diaminopimelate metabolic process | 6/141,4.26% | 13/1562,0.83% | 0.001 |
| D115113 | GO:0009089 | 5 | lysine biosynthetic process via diaminopimelate | 6/141,4.26% | 13/1562,0.83% | 0.001 |
| D115113 | GO:0006099 | 3 | tricarboxylic acid cycle | 12/141,8.51% | 20/1562,1.28% | 0 |
| D115113 | GO:1901615 | 3 | organic hydroxy compound metabolic process | 12/141,8.51% | 68/1562,4.35% | 0.0255 |
| D115113 | GO:1901617 | 4 | organic hydroxy compound biosynthetic process | 7/141,4.96% | 23/1562,1.47% | 0.0073 |
| D115113 | GO:0043043 | 5 | peptide biosynthetic process | 19/141,13.48% | 120/1562,7.68% | 0.0161 |
| D115113 | GO:0009314 | 3 | response to radiation | 4/141,2.84% | 12/1562,0.77% | 0.0474 |
| D116114 | GO:0044699 | 1 | single-organism process | 75/98,76.53% | 1042/1562,66.71% | 0.0444 |
| D116114 | GO:0044710 | 2 | single-organism metabolic process | 60/98,61.22% | 782/1562,50.06% | 0.0321 |
| D116114 | GO:0006071 | 5 | glycerol metabolic process | 4/98,4.08% | 15/1562,0.96% | 0.0199 |
| D116114 | GO:0044281 | 3 | small molecule metabolic process | 50/98,51.02% | 589/1562,37.71% | 0.0086 |
| D116114 | GO:0006082 | 4 | organic acid metabolic process | 34/98,34.69% | 368/1562,23.56% | 0.0126 |
| D116114 | GO:0043436 | 5 | oxoacid metabolic process | 34/98,34.69% | 368/1562,23.56% | 0.0126 |
| D116114 | GO:0055114 | 3 | oxidation-reduction process | 12/98,12.24% | 105/1562,6.72% | 0.0383 |
| D116114 | GO:0015980 | 4 | energy derivation by oxidation of organic compounds | 10/98,10.20% | 70/1562,4.48% | 0.0202 |
| D116114 | GO:0045333 | 5 | cellular respiration | 8/98,8.16% | 57/1562,3.65% | 0.0493 |
| D116114 | GO:0044763 | 2 | single-organism cellular process | 69/98,70.41% | 937/1562,59.99% | 0.0406 |
| D116114 | GO:0043241 | 5 | protein complex disassembly | 4/98,4.08% | 18/1562,1.15% | 0.045 |
| D116114 | GO:0009060 | 5 | aerobic respiration | 8/98,8.16% | 33/1562,2.11% | 0.0007 |
| D116114 | GO:0009141 | 5 | nucleoside triphosphate metabolic process | 7/98,7.14% | 46/1562,2.94% | 0.0459 |
| D116114 | GO:0019752 | 5 | carboxylic acid metabolic process | 34/98,34.69% | 357/1562,22.86% | 0.0074 |
| D116114 | GO:0072524 | 4 | pyridine-containing compound metabolic process | 8/98,8.16% | 52/1562,3.33% | 0.0272 |
| D116114 | GO:0006091 | 3 | generation of precursor metabolites and energy | 13/98,13.27% | 95/1562,6.08% | 0.0052 |
| D116114 | GO:1901607 | 5 | alpha-amino acid biosynthetic process | 12/98,12.24% | 107/1562,6.85% | 0.0446 |
| D116114 | GO:0006099 | 3 | tricarboxylic acid cycle | 7/98,7.14% | 20/1562,1.28% | 0.0001 |
| D116114 | GO:1901617 | 4 | organic hydroxy compound biosynthetic process | 5/98,5.10% | 23/1562,1.47% | 0.0213 |
| D116114 | GO:1901564 | 3 | organonitrogen compound metabolic process | 45/98,45.92% | 541/1562,34.64% | 0.0234 |
| D115116 | GO:0044710 | 2 | single-organism metabolic process | 78/131,59.54% | 782/1562,50.06% | 0.0371 |
| D115116 | GO:0044281 | 3 | small molecule metabolic process | 68/131,51.91% | 589/1562,37.71% | 0.0014 |
| D115116 | GO:0006082 | 4 | organic acid metabolic process | 45/131,34.35% | 368/1562,23.56% | 0.0057 |
| D115116 | GO:0043436 | 5 | oxoacid metabolic process | 45/131,34.35% | 368/1562,23.56% | 0.0057 |
| D115116 | GO:0009116 | 5 | nucleoside metabolic process | 14/131,10.69% | 93/1562,5.95% | 0.0325 |
| D115116 | GO:0046487 | 4 | glyoxylate metabolic process | 4/131,3.05% | 9/1562,0.58% | 0.0094 |
| D115116 | GO:0055114 | 3 | oxidation-reduction process | 20/131,15.27% | 105/1562,6.72% | 0.0003 |
| D115116 | GO:0015980 | 4 | energy derivation by oxidation of organic compounds | 16/131,12.21% | 70/1562,4.48% | 0.0001 |
| D115116 | GO:0045333 | 5 | cellular respiration | 16/131,12.21% | 57/1562,3.65% | 0 |
| D115116 | GO:1901657 | 3 | glycosyl compound metabolic process | 14/131,10.69% | 94/1562,6.02% | 0.0357 |
| D115116 | GO:0042278 | 5 | purine nucleoside metabolic process | 11/131,8.40% | 68/1562,4.35% | 0.0351 |
| D115116 | GO:0009060 | 5 | aerobic respiration | 13/131,9.92% | 33/1562,2.11% | 0 |
| D115116 | GO:0019752 | 5 | carboxylic acid metabolic process | 43/131,32.82% | 357/1562,22.86% | 0.0099 |
| D115116 | GO:0032268 | 5 | regulation of cellular protein metabolic process | 8/131,6.11% | 41/1562,2.62% | 0.0442 |
| D115116 | GO:0010608 | 5 | posttranscriptional regulation of gene expression | 8/131,6.11% | 37/1562,2.37% | 0.0231 |
| D115116 | GO:0034248 | 4 | regulation of cellular amide metabolic process | 8/131,6.11% | 36/1562,2.30% | 0.0192 |
| D115116 | GO:0006417 | 5 | regulation of translation | 8/131,6.11% | 36/1562,2.30% | 0.0192 |
| D115116 | GO:0006091 | 3 | generation of precursor metabolites and energy | 19/131,14.50% | 95/1562,6.08% | 0.0002 |
| D115116 | GO:0009066 | 5 | aspartate family amino acid metabolic process | 10/131,7.63% | 52/1562,3.33% | 0.0228 |
| D115116 | GO:0006099 | 3 | tricarboxylic acid cycle | 11/131,8.40% | 20/1562,1.28% | 0 |
| D115116 | GO:1901564 | 3 | organonitrogen compound metabolic process | 58/131,44.27% | 541/1562,34.64% | 0.0267 |
| D115116 | GO:0071941 | 3 | nitrogen cycle metabolic process | 5/131,3.82% | 16/1562,1.02% | 0.0181 |
| D113114 | GO:0044699 | 1 | single-organism process | 139/186,74.73% | 1042/1562,66.71% | 0.0272 |
| D113114 | GO:0044710 | 2 | single-organism metabolic process | 115/186,61.83% | 782/1562,50.06% | 0.0024 |
| D113114 | GO:0006096 | 5 | glycolytic process | 10/186,5.38% | 24/1562,1.54% | 0.001 |
| D113114 | GO:0006097 | 4 | glyoxylate cycle | 5/186,2.69% | 7/1562,0.45% | 0.0025 |
| D113114 | GO:0044281 | 3 | small molecule metabolic process | 98/186,52.69% | 589/1562,37.71% | 0.0001 |
| D113114 | GO:0006082 | 4 | organic acid metabolic process | 77/186,41.40% | 368/1562,23.56% | 0 |
| D113114 | GO:0043436 | 5 | oxoacid metabolic process | 77/186,41.40% | 368/1562,23.56% | 0 |
| D113114 | GO:0055086 | 4 | nucleobase-containing small molecule metabolic process | 33/186,17.74% | 166/1562,10.63% | 0.0039 |
| D113114 | GO:0009116 | 5 | nucleoside metabolic process | 22/186,11.83% | 93/1562,5.95% | 0.0023 |
| D113114 | GO:0006753 | 5 | nucleoside phosphate metabolic process | 27/186,14.52% | 131/1562,8.39% | 0.0059 |
| D113114 | GO:0006081 | 3 | cellular aldehyde metabolic process | 11/186,5.91% | 47/1562,3.01% | 0.0365 |
| D113114 | GO:0046487 | 4 | glyoxylate metabolic process | 6/186,3.23% | 9/1562,0.58% | 0.001 |
| D113114 | GO:0055114 | 3 | oxidation-reduction process | 21/186,11.29% | 105/1562,6.72% | 0.0228 |
| D113114 | GO:0015980 | 4 | energy derivation by oxidation of organic compounds | 18/186,9.68% | 70/1562,4.48% | 0.0022 |
| D113114 | GO:0045333 | 5 | cellular respiration | 17/186,9.14% | 57/1562,3.65% | 0.0004 |
| D113114 | GO:0044712 | 3 | single-organism catabolic process | 35/186,18.82% | 198/1562,12.68% | 0.0198 |
| D113114 | GO:0006629 | 3 | lipid metabolic process | 20/186,10.75% | 106/1562,6.79% | 0.048 |
| D113114 | GO:0006631 | 5 | fatty acid metabolic process | 13/186,6.99% | 42/1562,2.69% | 0.0015 |
| D113114 | GO:1901657 | 3 | glycosyl compound metabolic process | 22/186,11.83% | 94/1562,6.02% | 0.0026 |
| D113114 | GO:0042278 | 5 | purine nucleoside metabolic process | 19/186,10.22% | 68/1562,4.35% | 0.0005 |
| D113114 | GO:0009119 | 5 | ribonucleoside metabolic process | 20/186,10.75% | 89/1562,5.70% | 0.007 |
| D113114 | GO:0044763 | 2 | single-organism cellular process | 131/186,70.43% | 937/1562,59.99% | 0.0058 |
| D113114 | GO:0046459 | 5 | short-chain fatty acid metabolic process | 7/186,3.76% | 10/1562,0.64% | 0.0002 |
| D113114 | GO:0009060 | 5 | aerobic respiration | 14/186,7.53% | 33/1562,2.11% | 0 |
| D113114 | GO:0009132 | 5 | nucleoside diphosphate metabolic process | 10/186,5.38% | 30/1562,1.92% | 0.0065 |
| D113114 | GO:0009123 | 5 | nucleoside monophosphate metabolic process | 17/186,9.14% | 75/1562,4.80% | 0.0123 |
| D113114 | GO:0009141 | 5 | nucleoside triphosphate metabolic process | 12/186,6.45% | 46/1562,2.94% | 0.0116 |
| D113114 | GO:0009117 | 5 | nucleotide metabolic process | 27/186,14.52% | 129/1562,8.26% | 0.0047 |
| D113114 | GO:0019752 | 5 | carboxylic acid metabolic process | 76/186,40.86% | 357/1562,22.86% | 0 |
| D113114 | GO:0006139 | 4 | nucleobase-containing compound metabolic process | 84/186,45.16% | 586/1562,37.52% | 0.0426 |
| D113114 | GO:0072521 | 4 | purine-containing compound metabolic process | 21/186,11.29% | 88/1562,5.63% | 0.0026 |
| D113114 | GO:0006163 | 5 | purine nucleotide metabolic process | 19/186,10.22% | 73/1562,4.67% | 0.0014 |
| D113114 | GO:0072524 | 4 | pyridine-containing compound metabolic process | 15/186,8.06% | 52/1562,3.33% | 0.0015 |
| D113114 | GO:0019362 | 5 | pyridine nucleotide metabolic process | 14/186,7.53% | 45/1562,2.88% | 0.0009 |
| D113114 | GO:0006732 | 4 | coenzyme metabolic process | 23/186,12.37% | 118/1562,7.55% | 0.0227 |
| D113114 | GO:0006637 | 5 | acyl-CoA metabolic process | 6/186,3.23% | 10/1562,0.64% | 0.002 |
| D113114 | GO:0006733 | 5 | oxidoreduction coenzyme metabolic process | 15/186,8.06% | 57/1562,3.65% | 0.0042 |
| D113114 | GO:0035384 | 5 | thioester biosynthetic process | 5/186,2.69% | 7/1562,0.45% | 0.0025 |
| D113114 | GO:0035383 | 4 | thioester metabolic process | 6/186,3.23% | 10/1562,0.64% | 0.002 |
| D113114 | GO:0006412 | 5 | translation | 23/186,12.37% | 110/1562,7.04% | 0.0096 |
| D113114 | GO:0043603 | 4 | cellular amide metabolic process | 31/186,16.67% | 176/1562,11.27% | 0.0312 |
| D113114 | GO:0006518 | 5 | peptide metabolic process | 27/186,14.52% | 139/1562,8.90% | 0.0135 |
| D113114 | GO:0006091 | 3 | generation of precursor metabolites and energy | 27/186,14.52% | 95/1562,6.08% | 0 |
| D113114 | GO:0006757 | 4 | ATP generation from ADP | 10/186,5.38% | 25/1562,1.60% | 0.0014 |
| D113114 | GO:0016310 | 5 | phosphorylation | 15/186,8.06% | 64/1562,4.10% | 0.0138 |
| D113114 | GO:0019693 | 5 | ribose phosphate metabolic process | 23/186,12.37% | 96/1562,6.15% | 0.0015 |
| D113114 | GO:0071616 | 5 | acyl-CoA biosynthetic process | 5/186,2.69% | 7/1562,0.45% | 0.0025 |
| D113114 | GO:0006520 | 3 | cellular amino acid metabolic process | 42/186,22.58% | 207/1562,13.25% | 0.0006 |
| D113114 | GO:0043038 | 4 | amino acid activation | 13/186,6.99% | 27/1562,1.73% | 0 |
| D113114 | GO:0043039 | 5 | tRNA aminoacylation | 13/186,6.99% | 26/1562,1.66% | 0 |
| D113114 | GO:0009063 | 4 | cellular amino acid catabolic process | 10/186,5.38% | 41/1562,2.62% | 0.0351 |
| D113114 | GO:1901606 | 5 | alpha-amino acid catabolic process | 10/186,5.38% | 33/1562,2.11% | 0.0137 |
| D113114 | GO:1901605 | 4 | alpha-amino acid metabolic process | 29/186,15.59% | 163/1562,10.44% | 0.0335 |
| D113114 | GO:0009066 | 5 | aspartate family amino acid metabolic process | 13/186,6.99% | 52/1562,3.33% | 0.0126 |
| D113114 | GO:0006099 | 3 | tricarboxylic acid cycle | 14/186,7.53% | 20/1562,1.28% | 0 |
| D113114 | GO:1901135 | 3 | carbohydrate derivative metabolic process | 41/186,22.04% | 235/1562,15.04% | 0.0134 |
| D113114 | GO:0009259 | 5 | ribonucleotide metabolic process | 19/186,10.22% | 84/1562,5.38% | 0.0081 |
| D113114 | GO:1901564 | 3 | organonitrogen compound metabolic process | 87/186,46.77% | 541/1562,34.64% | 0.0011 |
| D113114 | GO:0043043 | 5 | peptide biosynthetic process | 23/186,12.37% | 120/1562,7.68% | 0.0276 |

* Chi-square test

**Table S5** KEGG pathway enrichment analysis of proteins with differential expressions

| Data Set | Pathway ID | Pathway Term | Cluster Frequency | Protein Frequency of Use | P Value* |
| --- | --- | --- | --- | --- | --- |
| D115113 | 01120 | Microbial metabolism in diverse environments | 33/99,33.33% | 161/938,17.16% | 0.0001 |
| D115113 | 01200 | Carbon metabolism | 19/99,19.19% | 91/938,9.70% | 0.0035 |
| D115113 | 00020 | Citrate cycle (TCA cycle) | 10/99,10.10% | 21/938,2.24% | 0 |
| D115113 | 00620 | Pyruvate metabolism | 11/99,11.11% | 42/938,4.48% | 0.0044 |
| D115113 | 00640 | Propanoate metabolism | 9/99,9.09% | 22/938,2.35% | 0.0006 |
| D115113 | 00630 | Glyoxylate and dicarboxylate metabolism | 10/99,10.10% | 26/938,2.77% | 0.0005 |
| D115113 | 00720 | Carbon fixation pathways in prokaryotes | 8/99,8.08% | 25/938,2.67% | 0.0088 |
| D115113 | 00300 | Lysine biosynthesis | 5/99,5.05% | 12/938,1.28% | 0.0167 |
| D115113 | 00750 | Vitamin B6 metabolism | 4/99,4.04% | 9/938,0.96% | 0.0319 |
| D115113 | 00261 | Monobactam biosynthesis | 4/99,4.04% | 8/938,0.85% | 0.02 |
| D116114 | 01120 | Microbial metabolism in diverse environments | 26/84,30.95% | 161/938,17.16% | 0.0017 |
| D116114 | 01130 | Biosynthesis of antibiotics | 26/84,30.95% | 168/938,17.91% | 0.0035 |
| D116114 | 01200 | Carbon metabolism | 17/84,20.24% | 91/938,9.70% | 0.0026 |
| D116114 | 01230 | Biosynthesis of amino acids | 17/84,20.24% | 110/938,11.73% | 0.0235 |
| D116114 | 00020 | Citrate cycle (TCA cycle) | 8/84,9.52% | 21/938,2.24% | 0.0004 |
| D116114 | 00720 | Carbon fixation pathways in prokaryotes | 6/84,7.14% | 25/938,2.67% | 0.05 |
| D116114 | 01210 | 2-Oxocarboxylic acid metabolism | 6/84,7.14% | 23/938,2.45% | 0.0326 |
| D116114 | 00710 | Carbon fixation in photosynthetic organisms | 5/84,5.95% | 16/938,1.71% | 0.026 |
| D115116 | 01120 | Microbial metabolism in diverse environments | 28/101,27.72% | 161/938,17.16% | 0.009 |
| D115116 | 01200 | Carbon metabolism | 22/101,21.78% | 91/938,9.70% | 0.0002 |
| D115116 | 00020 | Citrate cycle (TCA cycle) | 10/101,9.90% | 21/938,2.24% | 0.0001 |
| D115116 | 00720 | Carbon fixation pathways in prokaryotes | 8/101,7.92% | 25/938,2.67% | 0.0104 |
| D113114 | 01110 | Biosynthesis of secondary metabolites | 50/136,36.76% | 254/938,27.08% | 0.0191 |
| D113114 | 01120 | Microbial metabolism in diverse environments | 42/136,30.88% | 161/938,17.16% | 0.0001 |
| D113114 | 01130 | Biosynthesis of antibiotics | 35/136,25.74% | 168/938,17.91% | 0.0294 |
| D113114 | 01200 | Carbon metabolism | 34/136,25.00% | 91/938,9.70% | 0 |
| D113114 | 00620 | Pyruvate metabolism | 16/136,11.76% | 42/938,4.48% | 0.0004 |
| D113114 | 00720 | Carbon fixation pathways in prokaryotes | 13/136,9.56% | 25/938,2.67% | 0.0001 |
| D113114 | 00020 | Citrate cycle (TCA cycle) | 12/136,8.82% | 21/938,2.24% | 0.0001 |
| D113114 | 00970 | Aminoacyl-tRNA biosynthesis | 12/136,8.82% | 26/938,2.77% | 0.0009 |
| D113114 | 00680 | Methane metabolism | 11/136,8.09% | 24/938,2.56% | 0.0017 |
| D113114 | 00640 | Propanoate metabolism | 12/136,8.82% | 22/938,2.35% | 0.0002 |
| D113114 | 00630 | Glyoxylate and dicarboxylate metabolism | 12/136,8.82% | 26/938,2.77% | 0.0009 |
| D113114 | 00010 | Glycolysis/Gluconeogenesis | 10/136,7.35% | 33/938,3.52% | 0.033 |

* Chi-square test

**Table S6** Antimicrobial mechanisms of ATN based on molecular function, biological process and KEGG pathway

| mechanism | **Oxidative stress storm and redox system collapse** | **Energy metabolism collapse** | **amino acid and coenzyme metabolic collapse** |
| --- | --- | --- | --- |
| Molecular Function (GO Term) | oxidoreductase activity (GO:0016491) | nucleoside phosphate binding (GO:1901265) | pyridoxal phosphate binding (GO:0030170) |
| oxidoreductase activity (GO:0016491) | ATP binding (GO 0005524) | transaminase activity (GO:0008483) |
| oxidoreductase activity, acting on the CH-OH group of donors, NAD or NADP as acceptor (G00016616) | identical protein binding (GO 0042802), | coenzyme binding (GO 0050662) |
| NAD binding (GO 00051287) | protein binding (GO 0005515) | vitamin binding (GO 0019842) |
| sulfur compound binding (GO 1901687) | oxidoreductase activity (GO:0016491) |  |
| cofactor binding (GO:0048037) | nucleotide binding (GO:0000166) |  |
| coenzyme binding (GO:0050662) | purine ribonucleoside triphosphate binding (GO:0035639) |  |
|  | NAD binding (GO:0051287) |  |
| Biological process (GO Term) | oxidation-reduction process (GO:0055114) | tricarboxylic acid cycle (GO:0006099) | alpha-amino acid biosynthetic process (GO:1901607) |
| energy derivation by oxidation of organic compounds (GO 15980) | cellular respiration (GO:0045333) | vitamin B6 metabolic process (GO:0042816) |
| cellular respiration (GO:0045333) | organic acid metabolic process (GO:0006082) | aspartate family amino acid metabolic process (GO:0009066) |
| aerobic respiration (GO 0009060) | oxidation-reduction process (GO:0055114) | lysine biosynthetic process via diaminopimelate (GO 0009089) |
| small molecule metabolic process (GO:0044281) | generation of precursor metabolites and energy (GO:0006091) |  |
| cellular respiration (GO:0045333) | energy derivation by oxidation of organic compounds (GO 15980) |  |
|  | ATP generation from ADP (GO 0006757) |  |
|  | aerobic respiration (GO 0009060) |  |
| KEGG pathway | TCA cycle (00020) | TCA cycle (00020) | Lysine biosynthesis (00300) |
| Biosynthesis of amino acids (01230) | Pyruvate metabolism (00620) | Vitamin B6 metabolism (00750) |
| Pyruvate metabolism (00620) | Carbon metabolism (01200) |  |
| Carbon metabolism (01200) | Glyoxylate and dicarboxylate metabolism (GO 00630) |  |
| Antimicrobial mechanism | The ROS generated by ATN can cause severe oxidative stress, which directly attacks key enzymes in the TCA cycle and respiratory chain, such as iron sulfur cluster dehydrating enzymes and cytochrome complexes, triggering the cascade amplification of metabolic collapse and devastating impact on the redox system of *E. coli*. The redox process is one of the most significantly enriched pathways in all datasets, indicating severe oxidative stress occurring within bacterial cells. The disruption of cellular respiration and aerobic respiration processes further confirms the disruption of the electron transport chain and energy metabolism system, which is closely related to membrane dysfunction.  Synthetic precursors interruption: GSH is synthesized from glutamic acid, cysteine, and glycine. The intermediate product of the TCA cycle, *α*-ketoglutarate, is a precursor of glutamate, and inhibition of the TCA cycle directly leads to a decrease in glutamate synthesis.  Insufficient supply of amino acids: The extensive amino acid biosynthesis pathway is disrupted, affecting the supply of all amino acids including cysteine and glycine, thereby limiting the synthesis ability of GSH.  Overconsumption: To neutralize the huge ROS induced by ATN, GSH is consumed in large quantities, and the synthesis rate cannot keep up with the consumption rate, resulting in a sharp decrease in its level, until GSH depletion. | The TCA cycle is the core of cellular energy metabolism that exhibits extremely significant enrichment, indicating that ATN precisely destroys the "energy heart" of *E. coli*, which not only leads to the interruption of ATP synthesis, but also affects the metabolic network that provides precursors for various biosynthetic processes.  ATP synthesis is interrupted, and cellular energy supply is depleted by disrupting key pathways of energy metabolism (such as TCA cycle and cellular respiration), ultimately leading to cell death7.The dysfunction of ATP/ADP binding proteins directly reflects the breakdown of energy metabolism. Oxidative stress leads to membrane dysfunction and reduced ATP synthesis, further exacerbating the energy crisis of cells. The dysfunction of ATP binding proteins directly reflects the severe imbalance of ATP metabolism in cells. These proteins include ATP synthase, ion pumps (such as Ca²⁺-ATPase), and various kinases The abnormal function of ADP binding protein indicates that the ATP-ADP cycle is blocked, and energy metabolism is in a state of collapse. | Vitamin B6 (pyridoxal phosphate) is a core coenzyme in amino acid metabolism, and its metabolic disorder directly affects the synthesis of aspartic acid family and lysine. The deficiency of these essential amino acids not only inhibits protein synthesis, but also affects cell wall formation, leading to damage to cell structural integrity. Additionally, the binding dysfunction of Vitamin B6directly affects multiple metabolic pathways, further weakening the stress resistance of cells. |

**Table S7** Differential metabolic pathway group

| Date set | The number of differential proteins with KO numbers | Number of differential proteins upregulated in metabolic pathways | Number of differential proteins downregulated in metabolic pathways | Detailed information on metabolic pathways |
| --- | --- | --- | --- | --- |
| D115113 | 146 | 99 | 98 | D115113_KEGG_pathway.xls |
| D116114 | 103 | 84 | 84 | D116114_KEGG_pathway.xls |
| D115116 | 135 | 101 | 101 | D115116_KEGG_pathway.xls |
| D113114 | 193 | 136 | 134 | D113114_KEGG_pathway.xls |

**Table S87** protein-protein interaction network analysis

| Date set | STRING Non- repetitive protein number | interacting nodes number | Protein information | Interaction information | Interaction picture |
| --- | --- | --- | --- | --- | --- |
| D115113 | 151 | 143 | D115113_pro_info.xls | D115113_map_info.xls | D115113_map.jpg |
| D116114 | 107 | 96 | D116114_pro_info.xls | D116114_map_info.xls | D116114_map.jpg |

*Note*: In the interaction image, the red dots represent upregulated proteins and the blue nodes represent downstream proteins (seen Fig.S3)

**References**

[1] S.G. Chen, Y.J. Guo, S.J. Chen, et al.(2012). Facile preparation and synergistic antibacterial effect of three-component Cu/TiO2/CS nanoparticles. J Mater Chem. **22**(18), 9092-9099. <https://doi.org/https://doi.org/10.1039/c2jm00063f>

[2] S.G. Chen, S.J. Chen, S. Jiang, et al.(2011). Study of zwitterionic sulfopropylbetaine containing reactive siloxanes for application in antibacterial materials. Colloids Surf B. **85**(2), 323-329. <https://doi.org/https://doi.org/10.1016/j.colsurfb.2011.03.004>

[3] L. Puricelli, M. Galluzzi, C. Schulte, et al.(2015). Nanomechanical and topographical imaging of living cells by atomic force microscopy with colloidal probes. Rev Sci Instrum. **86**(3), 033705. <https://doi.org/https://doi.org/10.1063/1.4915896>

[4] M. Galluzzi, C.S. Biswas, Y.H. Wu, et al.(2016). Space-resolved quantitative mechanical measurements of soft and supersoft materials by atomic force microscopy. NPG Asia Mater. **8**(e327. <https://doi.org/https://doi.org/10.1038/am.2016.170>

[5] G.G. Bilodeau(1992). Regular pyramid punch problem. J Appl Mech. **59**(3), 519-523. <https://doi.org/https://doi.org/10.1115/1.2893754>
